# Supplementary material
Source: Springer Nature journal article supplement (https://www.springermedizin.de/resource/supplementary/13054_2011_586_MOESM2_ESM.pdf/9708796)

|   |         |            |
|---|---------|------------|
| 3 | Onde Am | 97.45 cm/s |
|   | Em/Am   | 0.67       |
| 2 | TDE     | 266.17 ms  |
| 1 | Onde E  | 65.44 cm/s |

Baseline (A)

Baseline (B)

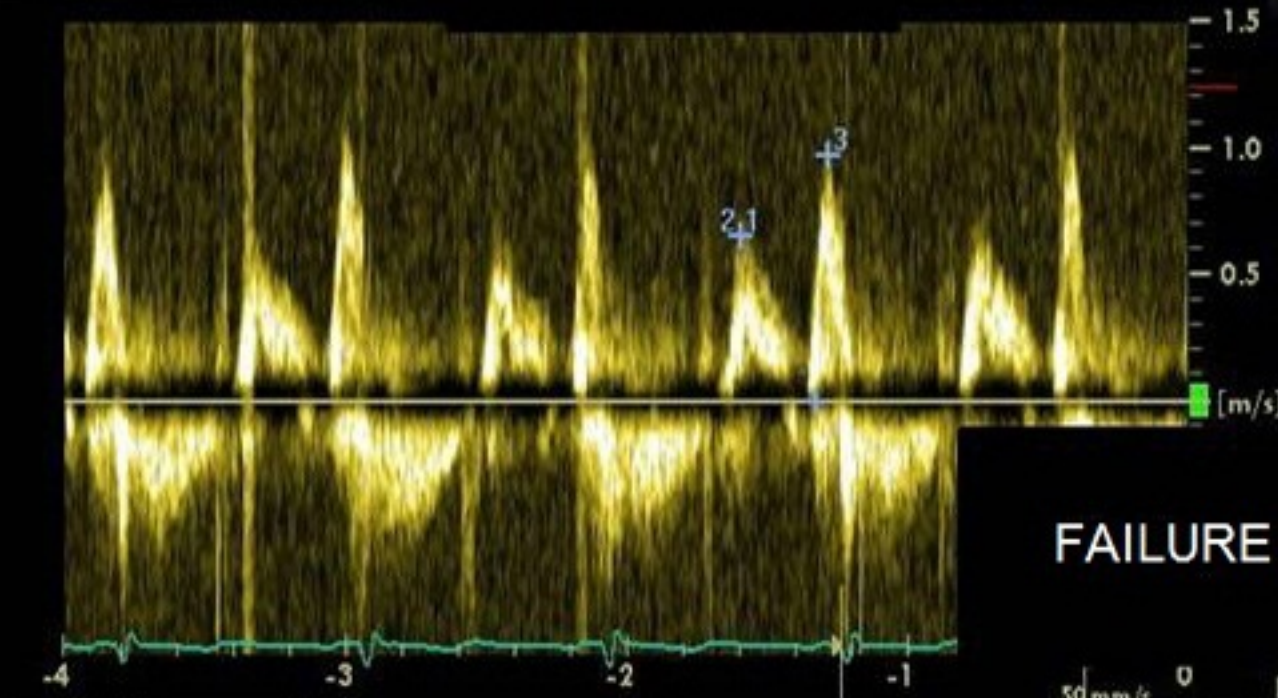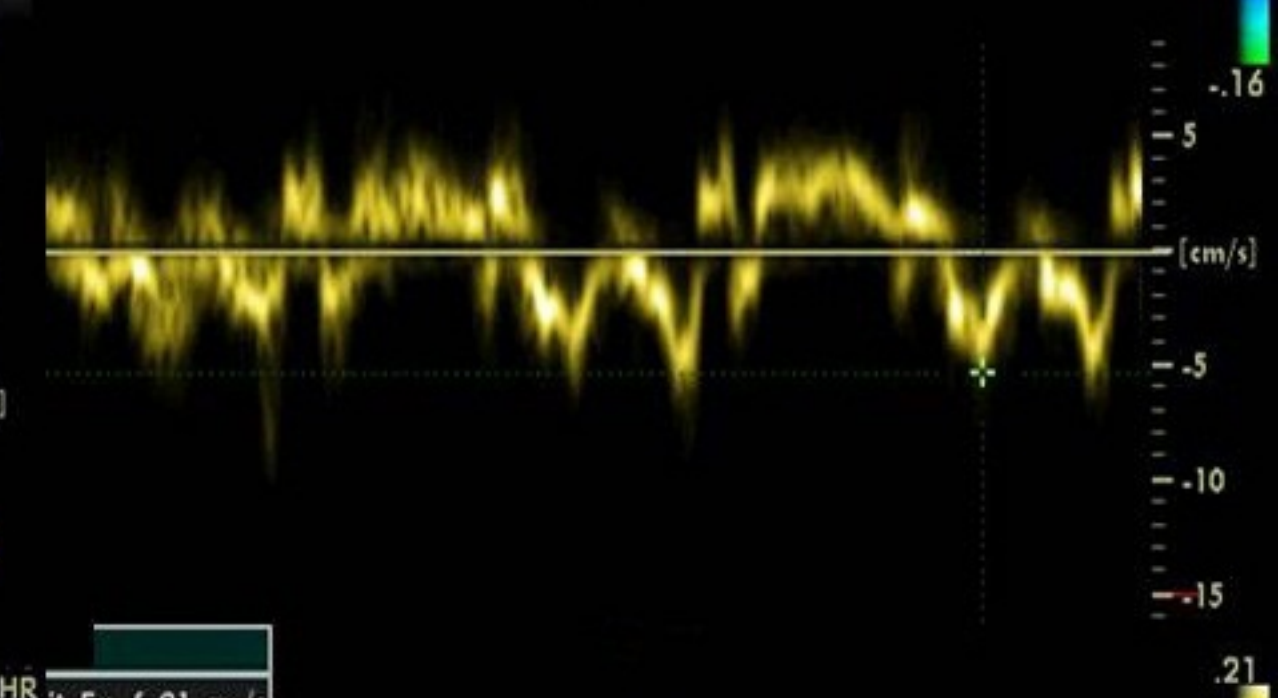

|          |             |
|----------|-------------|
| Em/Am    | 1.81        |
| 2 TDE    | 199.63 ms   |
| 1 Onde E | 108.17 cm/s |

SBT (C)

FAILURE

|            |           |
|------------|-----------|
| HR vit. Ea | 6.21 cm/s |
|------------|-----------|

SBT (D)

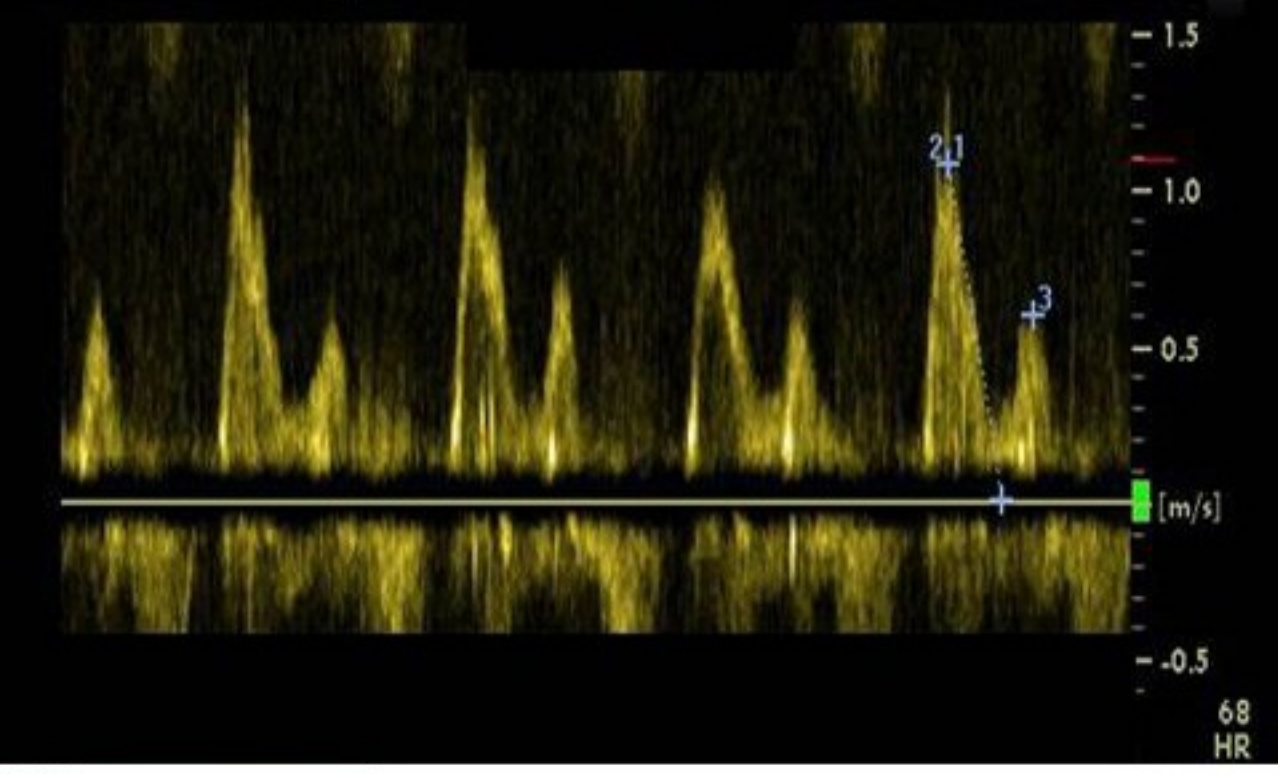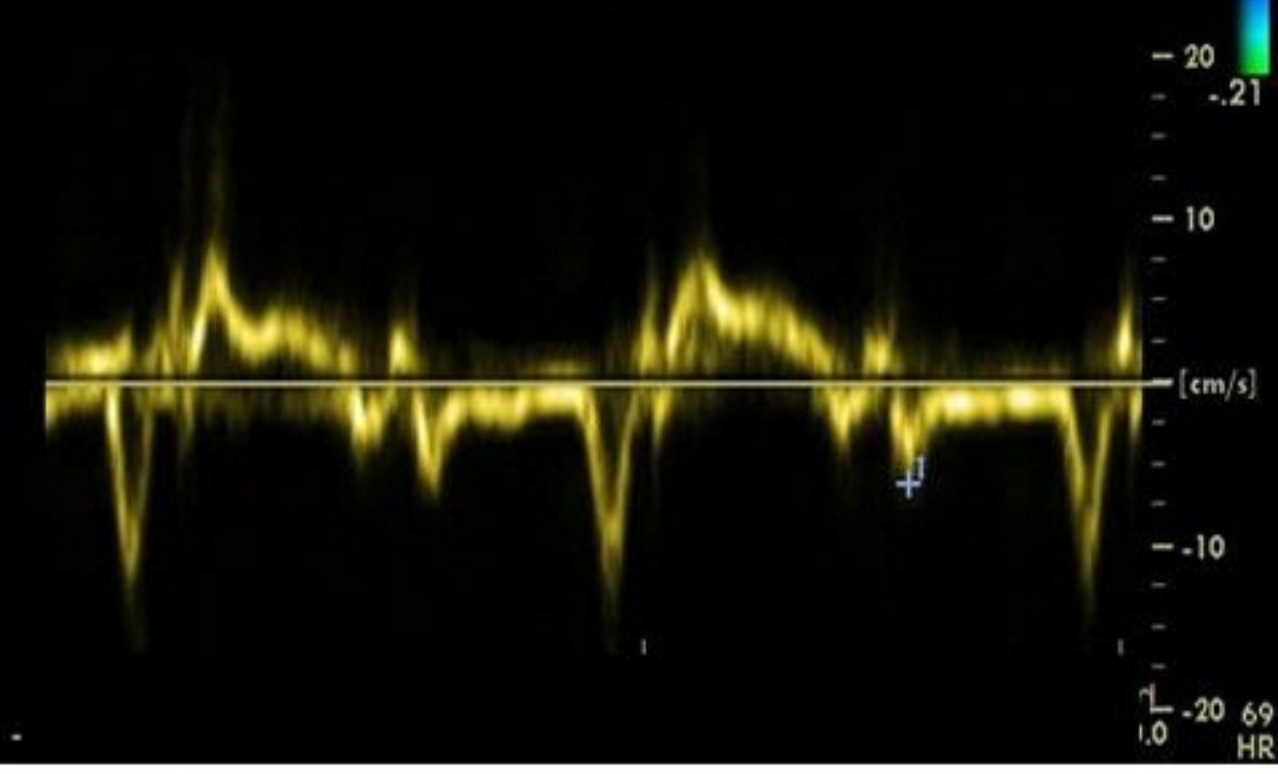

|               |                       |
|---------------|-----------------------|
| 2 Vit E VM    | 0.74 m/s              |
| Tps Dec. VM   | 167.17 ms             |
| Pente Dec. VM | 4.41 m/s <sup>2</sup> |
| 1 Vit E VM    | 0.75 m/s              |
| Tps Dec. VM   | 0.00 ms               |
| Vit A VM      | 0.43 m/s              |
| Ratio E/A VM  | 1.72                  |

Baseline (E)

|           |           |
|-----------|-----------|
| 2 Vit. Ea | 8.55 cm/s |
| 1 Vit. S  | 4.61 cm/s |

Baseline (F)

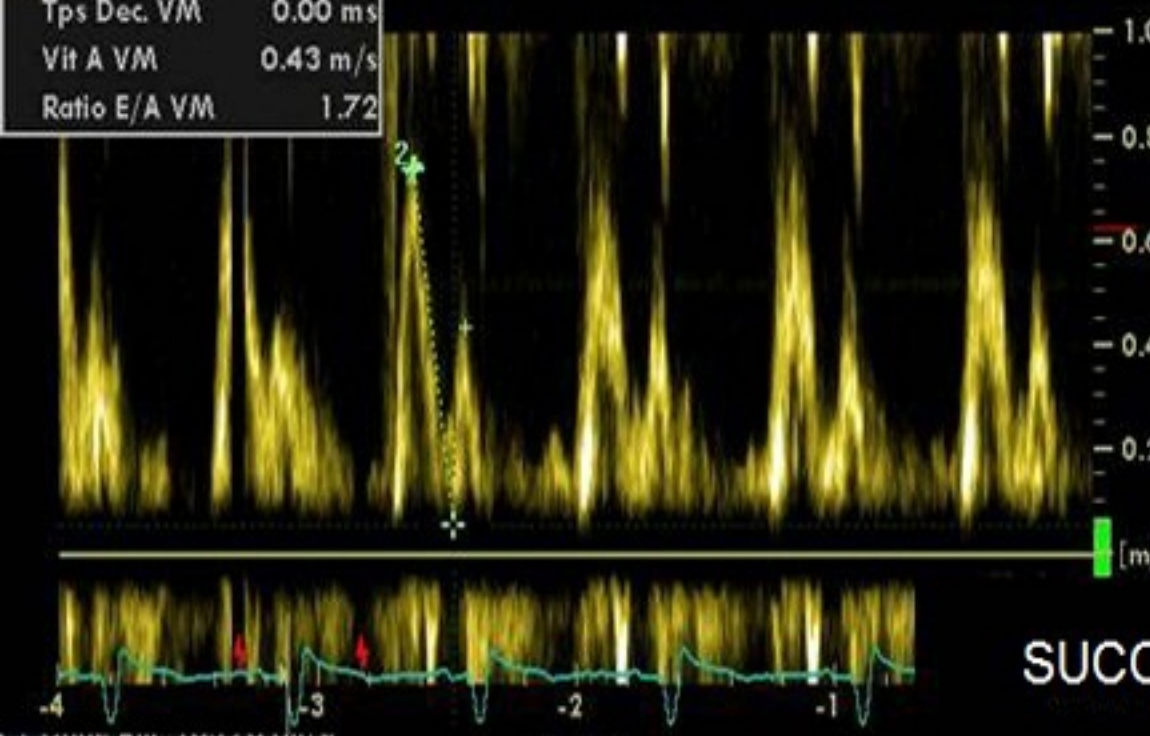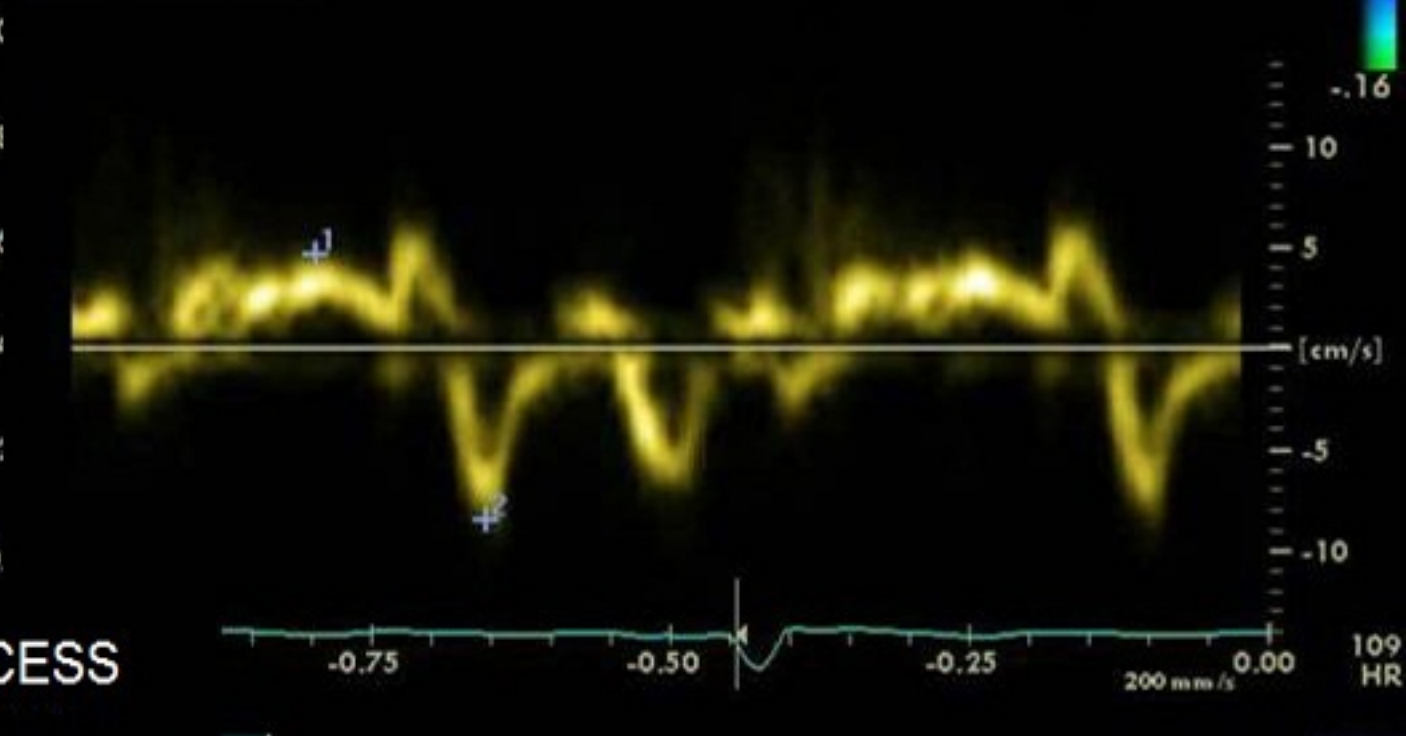

|          |             |
|----------|-------------|
| Em/Am    | 1.17        |
| 2 TDE    | 177.45 ms   |
| 1 Onde E | 121.75 cm/s |

SBT (G)

SUCCESS

|                     |           |
|---------------------|-----------|
| SpV <sub>0000</sub> | 0.10 m/s  |
| p                   | 0.04 mmHg |

SBT (H)

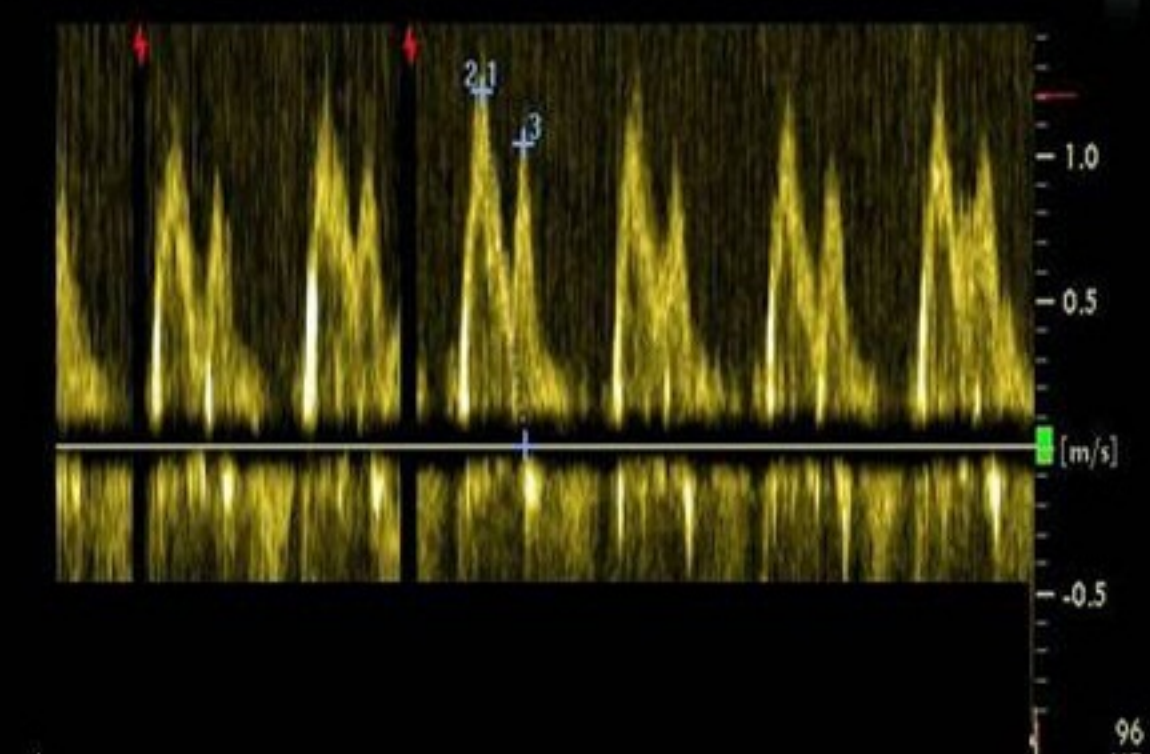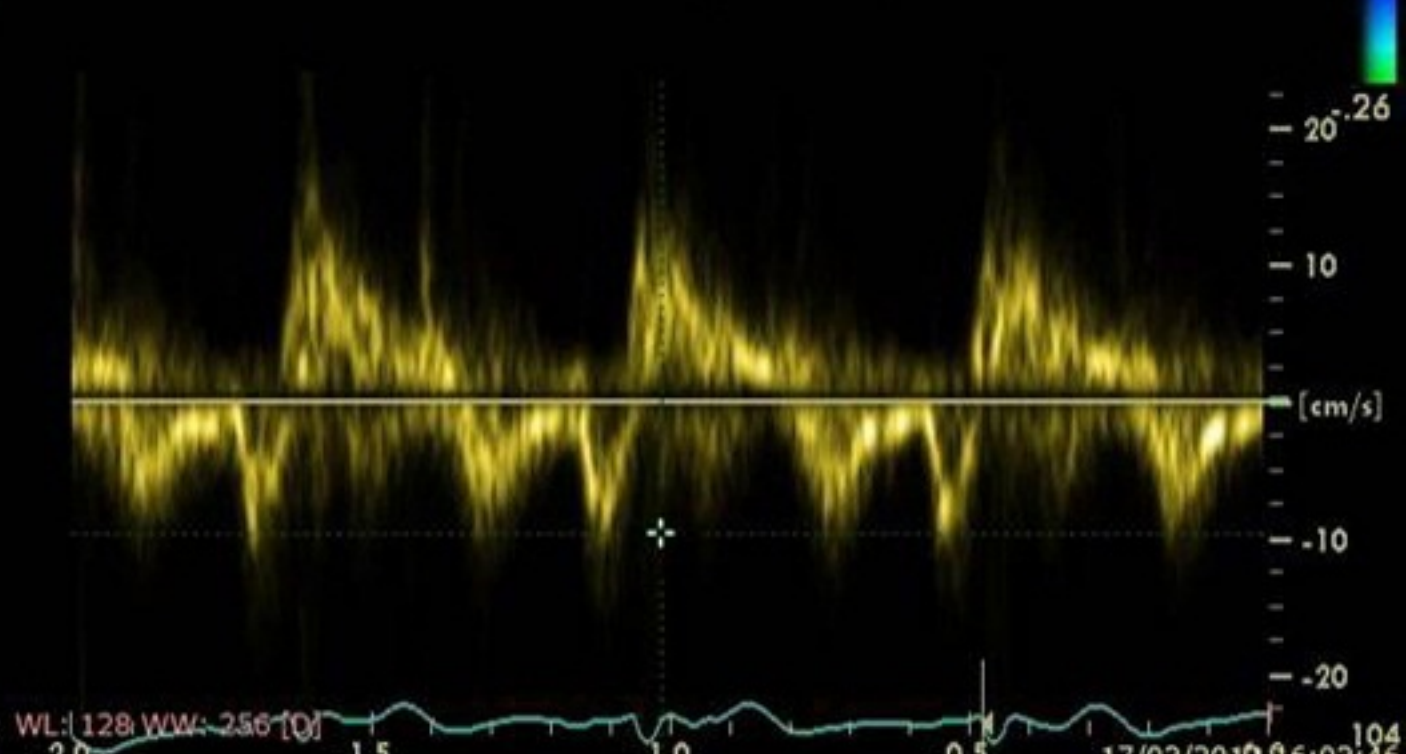

Supplement: MOESM2 [file 9708796]
